# Supplementary material for: The impact of US–China tensions on US science: Evidence from the NIH investigations
Source: PubMed Central journal article supplement (PMC11087765; doi:10.1073/pnas.2301436121), 2024-04-30
Supplement: pnas.2301436121.sapp.pdf [file pnas.2301436121.sapp.pdf]

# PNAS



1

## 2 **Supporting Information for**

### 3 **The Impact of U.S.-China Tensions on U.S. Science: Evidence from the NIH Investigations**

4 **Ruixue Jia, Margaret E. Roberts, Ye Wang and Eddie Yang**

5 **Margaret E. Roberts**

6 **E-mail: [meroberts@ucsd.edu](mailto:meroberts@ucsd.edu)**

#### 7 **This PDF file includes:**

8 Figs. S1 to S3

9 Tables S1 to S16

10 SI References

11 **1. More on Background and Data Construction**

12 **A. Background of NIH Investigations.** The NIH investigations began with a Dear Colleague letter in August of 2018 to many  
13 institutions of higher education.\* As described in detail in (1), the NIH sent more detailed letters to approximately 100  
14 institutions, with questions about 246 scientists. 81% of the scientists were from Asian descent and 90% of the cases involved  
15 resources or activities in China. Many of the allegations were that the scientists had not disclosed affiliations, collaborations, or  
16 funding from international sources. (See <https://grants.nih.gov/sites/default/files/Foreign-Interference-12-9-22-report.pdf> for NIH  
17 data on the investigations.) According to interviews conducted by (1), it appeared that the NIH had identified these individuals  
18 in part from the acknowledgement section of academic papers, which contained information about co-authors or funding from  
19 China. 42% of these investigated scientists were terminated from their job, and about 20% were banned from NIH funding.

20 **B. Trends in Collaboration Patterns of Chinese Scientists.** Figure 1 in the main text provides the changes in the collaboration  
21 patterns of U.S. PubMed publications. Here, Figure S1 shows the changes for Chinese PubMed publications. Similar to patterns  
22 found for the U.S. PubMed publications, the share of PubMed publications by scientists in China that are collaborations with  
23 U.S. scientists declined in recent years, although the decline seems to have started around 2016.

24 In addition, during its zenith, collaborations between the U.S. and China contribute to nearly 15% of Chinese publications  
25 in PubMed, whereas they constitute 8% of U.S. publications. This contrast underscores the greater significance of the U.S. as a  
26 collaborative partner for China compared to the reverse scenario.

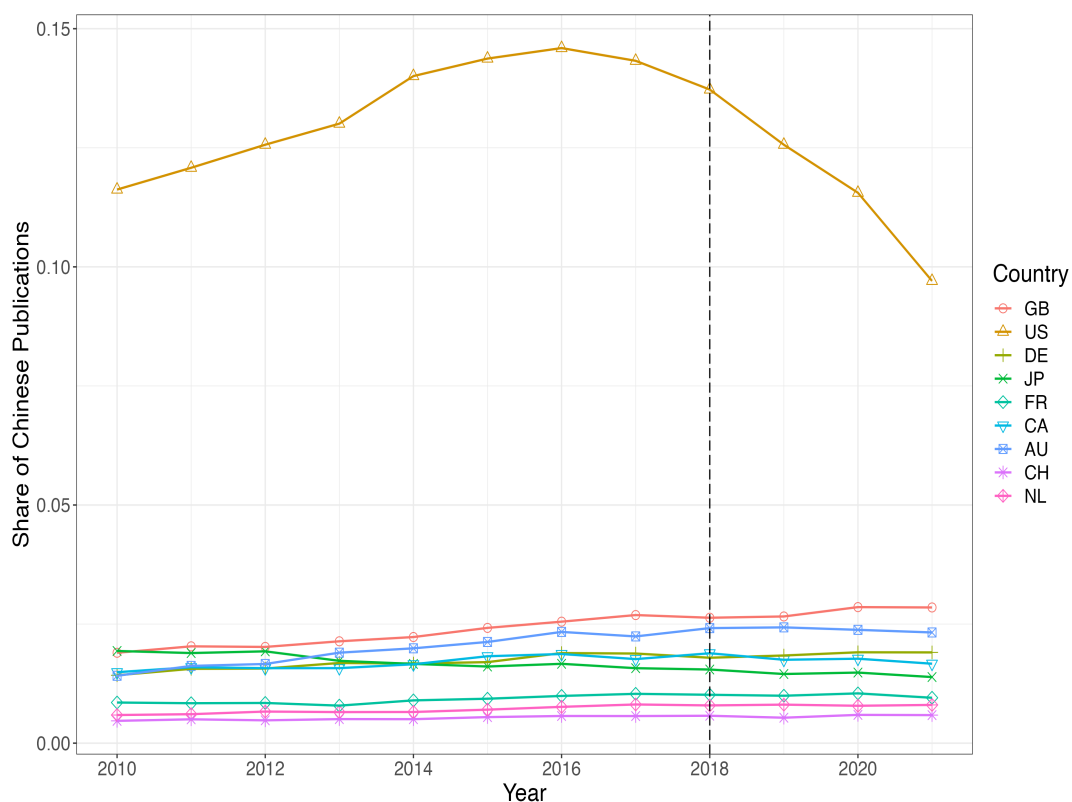

**Fig. S1.** Collaboration as Share of Total Chinese PubMed Publications

*Note:* The data is based on publications indexed by PubMed from Dimensions (see more on the data construction in Section 2 of the main text). Each line represents Chinese collaboration with a given country in PubMed publications as its share of total Chinese PubMed publications. Note that the data include all scientists in the Dimensions database, not just those included in the data we describe below.

\*<https://www.insidehighered.com/sites/default/files/media/NIH%20Foreign%20Influence%20Letter%20to%20Grantees%2008-20-18.pdf>

27 **C. Data Validation.** For both publications and citations, we find high correlations between Dimensions data and Google Scholar  
28 data (collected March of 2022) for a sample of scientists, which gives us confidence in using Dimensions data. As shown in  
29 Figure S2 below, the correlations are around 0.82 for both measures.

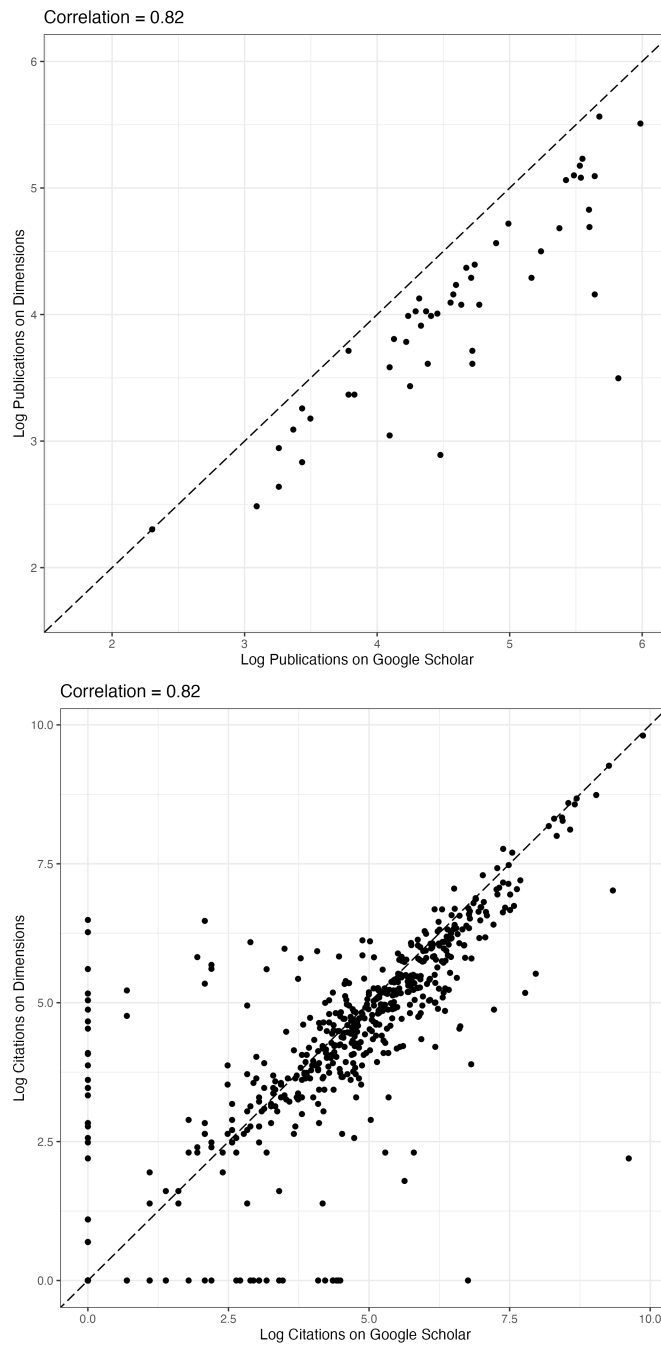

**Fig. S2.** Correlations of Data Between Dimensions and Google Scholar

*Note:* Each dot represents an author. The X-axis is logged number of publications (upper panel) and citations (lower panel) in 2010–2020 from Google Scholar and the Y-axis is logged number of publications and citations in 2010–2020 from Dimensions. Dashed line is the 45 degree line representing perfect correlation.

<sup>30</sup> **D. Predicting Asian Surnames.** We predict the ethnicity of each scientist in our sample using the methodology developed by  
<sup>31</sup> (2). The authors construct their training set by combining Census Bureau's Surname List with various information from voter  
<sup>32</sup> registration records. They then use Bayes' rule to predict the posterior probability of each individual with given demographic  
<sup>33</sup> information to belong to each of the five ethnic groups: White, Black, Hispanic, Asian and Other. We implement the method  
<sup>34</sup> using the R package *wru*, which generates probability estimates for each surname in our sample. The most frequent surnames  
<sup>35</sup> that are considered Asian by the method include *Wang* (578), *Chen* (447), and *Zhang* (400). It is worth noting that the  
<sup>36</sup> method cannot distinguish Chinese surnames from other Asian surnames. Hence, the most common Asian surnames also  
<sup>37</sup> include Korean surnames (e.g. *Kim*) or South Asian surnames (e.g. *Singh*).

38 **2. Additional Results on Our Main Finding**

39 **A. Distribution of main outcome variables.**

**Fig. S3.** Distribution of Main Outcome Variables

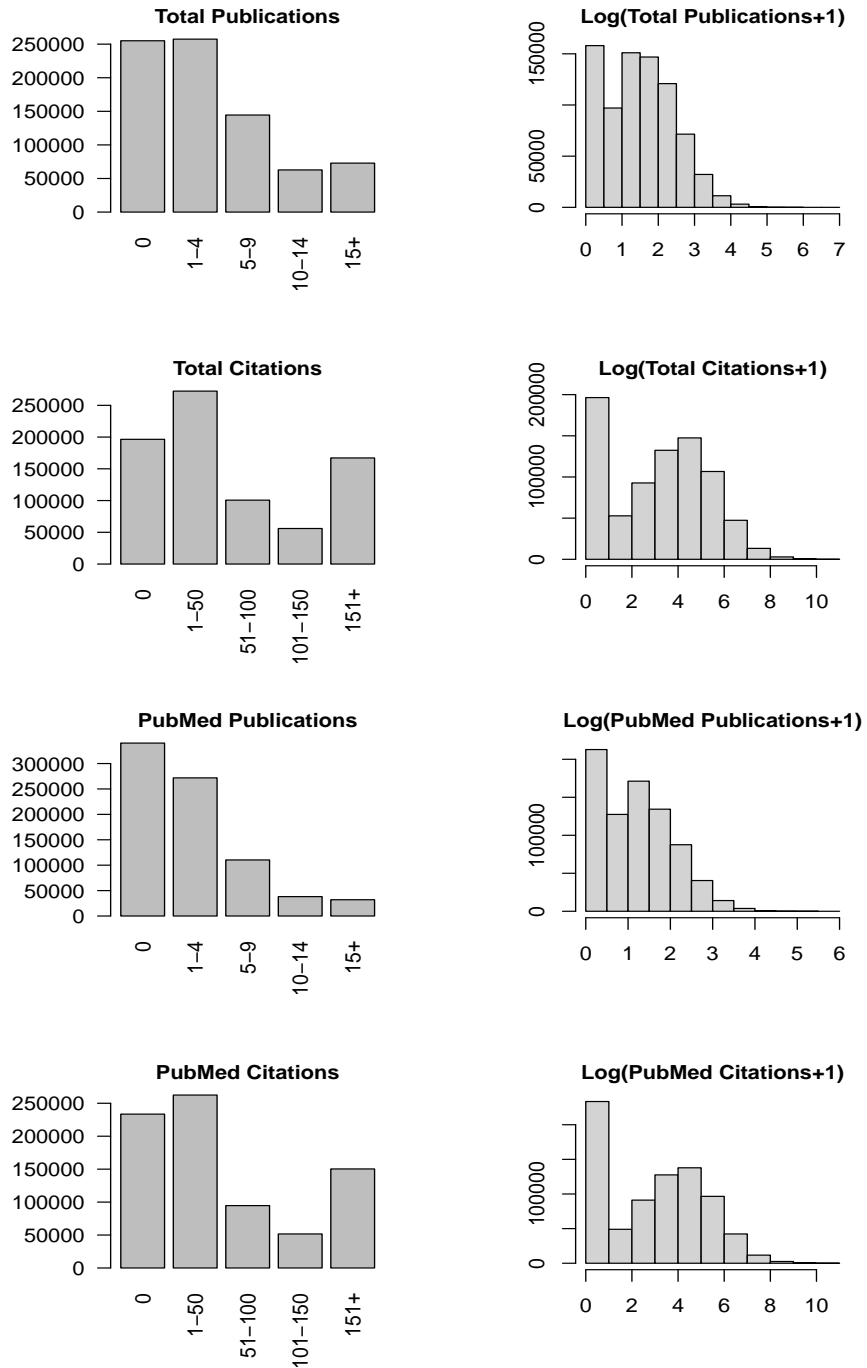

*Note:* These plots show the distribution of our main outcome variables in the analysis. The left panel presents the distribution of the original variables. The right panel shows the distribution of the logarithm transformation of the variables.

40 **B. More Results on Balancing Strategies.** We employ additional matching methods, including propensity score balancing and  
 41 nearest neighbor matching (based on covariates), for robustness. Table S1 presents the balance tests across these methods,  
 42 and Table S2 compares the results using different methods. As shown, the results are very similar across the three strategies.  
 43 Compared with the other methods, entropy balancing has the advantages of not dropping observations.

**Table S1. Balance Tests**

|                    | Treated Group | Control group |                      |                                 |                                 |
|--------------------|---------------|---------------|----------------------|---------------------------------|---------------------------------|
|                    | Raw Data      | Raw Data      | Entropy<br>Balancing | Propensity<br>Score<br>Matching | Nearest<br>Neighbor<br>Matching |
| Total Publications | 45.87         | 22.84         | 45.87                | 46.04                           | 43.95                           |
| Total Citations    | 2774.09       | 925.87        | 2774.09              | 2760.38                         | 2553.43                         |
| NIH Publications   | 14.29         | 6.36          | 14.29                | 13.88                           | 13.61                           |
| Asian              | 0.29          | 0.12          | 0.29                 | 0.28                            | 0.28                            |

**Table S2. The Impacts on Productivity: Alternative Balancing Strategies**

|                             | (1)                     | (2)               | (3)               | (4)                  | (5)               | (6)               |
|-----------------------------|-------------------------|-------------------|-------------------|----------------------|-------------------|-------------------|
| <b>Panel A</b>              | PubMed Publications     |                   |                   | PubMed Citations     |                   |                   |
| Ties to China $\times$ Post | -0.021<br>(0.005)       | -0.021<br>(0.003) | -0.023<br>(0.003) | -0.101<br>(0.012)    | -0.121<br>(0.008) | -0.119<br>(0.008) |
| Pre-treatment avg.          | 1.502                   | 1.502             | 1.502             | 4.163                | 4.163             | 4.163             |
| R2                          | 0.783                   | 0.735             | 0.735             | 0.706                | 0.664             | 0.662             |
| No. of obs.                 | 792582                  | 621978            | 620326            | 792582               | 621978            | 620326            |
| Scholar FE                  | Y                       | Y                 | Y                 | Y                    | Y                 | Y                 |
| Year FE                     | Y                       | Y                 | Y                 | Y                    | Y                 | Y                 |
| Entropy Balancing           | Y                       |                   |                   | Y                    |                   |                   |
| Propensity Score Matching   |                         | Y                 |                   |                      | Y                 |                   |
| Nearest Neighbor Matching   |                         |                   | Y                 |                      |                   | Y                 |
| <b>Panel B</b>              | Non-PubMed Publications |                   |                   | Non-PubMed Citations |                   |                   |
| Ties to China $\times$ Post | 0.014<br>(0.008)        | 0.022<br>(0.003)  | 0.020<br>(0.003)  | -0.057<br>(0.014)    | -0.065<br>(0.006) | -0.065<br>(0.006) |
| Pre-treatment avg.          | 0.981                   | 0.981             | 0.981             | 1.401                | 1.401             | 1.401             |
| R2                          | 0.690                   | 0.647             | 0.647             | 0.650                | 0.634             | 0.634             |
| No. of obs.                 | 792582                  | 621978            | 620326            | 792582               | 621978            | 620326            |
| Scholar FE                  | Y                       | Y                 | Y                 | Y                    | Y                 | Y                 |
| Year FE                     | Y                       | Y                 | Y                 | Y                    | Y                 | Y                 |
| Entropy Balancing           | Y                       |                   |                   | Y                    |                   |                   |
| Propensity Score Matching   |                         | Y                 |                   |                      | Y                 |                   |
| Nearest Neighbor Matching   |                         |                   | Y                 |                      |                   | Y                 |
| <b>Panel C</b>              | Total Publications      |                   |                   | Total Citations      |                   |                   |
| Ties to China $\times$ Post | -0.011<br>(0.006)       | -0.006<br>(0.004) | -0.009<br>(0.004) | -0.105<br>(0.012)    | -0.112<br>(0.007) | -0.112<br>(0.007) |
| Pre-treatment avg.          | 1.878                   | 1.878             | 1.878             | 4.470                | 4.470             | 4.470             |
| R2                          | 0.798                   | 0.759             | 0.758             | 0.727                | 0.689             | 0.688             |
| No. of obs.                 | 792582                  | 621978            | 620326            | 792582               | 621978            | 620326            |
| Scholar FE                  | Y                       | Y                 | Y                 | Y                    | Y                 | Y                 |
| Year FE                     | Y                       | Y                 | Y                 | Y                    | Y                 | Y                 |
| Entropy Balancing           | Y                       |                   |                   | Y                    |                   |                   |
| Propensity Score Matching   |                         | Y                 |                   |                      | Y                 |                   |
| Nearest Neighbor Matching   |                         |                   | Y                 |                      |                   | Y                 |

*Note:* All outcomes are log-transformed, and the models always control for scholar and year fixed effects. Columns (1) and (4) present results using entropy balancing; Columns (2) and (5) present results using propensity score balancing; while Columns (3) and (6) present results using nearest neighbor matching. Standard errors are clustered at the scholar level.

Table S3. Impacts on Productivity: Inverse Hyperbolic Sine Transformation

|                             | (1)                     | (2)               | (3)               | (4)                  | (5)               | (6)               |
|-----------------------------|-------------------------|-------------------|-------------------|----------------------|-------------------|-------------------|
| <b>Panel A</b>              | PubMed Publications     |                   |                   | PubMed Citations     |                   |                   |
| Ties to China $\times$ Post | -0.032<br>(0.004)       | -0.024<br>(0.004) | -0.025<br>(0.006) | -0.175<br>(0.008)    | -0.095<br>(0.009) | -0.095<br>(0.013) |
| Pre-treatment avg.          | 1.899                   | 1.899             | 1.899             | 4.730                | 4.730             | 4.730             |
| R2                          | 0.722                   | 0.723             | 0.772             | 0.651                | 0.652             | 0.696             |
| No. of obs.                 | 792582                  | 792582            | 792582            | 792582               | 792582            | 792582            |
| Scholar FE                  | Y                       | Y                 | Y                 | Y                    | Y                 | Y                 |
| Year FE                     | Y                       | Y                 | Y                 | Y                    | Y                 | Y                 |
| Baseline Covariates*Year FE |                         | Y                 |                   |                      | Y                 |                   |
| Entropy Balancing           |                         |                   | Y                 |                      |                   | Y                 |
| <b>Panel B</b>              | Non-PubMed Publications |                   |                   | Non-PubMed Citations |                   |                   |
| Ties to China $\times$ Post | 0.030<br>(0.004)        | 0.020<br>(0.004)  | 0.017<br>(0.009)  | -0.075<br>(0.006)    | -0.068<br>(0.007) | -0.053<br>(0.016) |
| Pre-treatment avg.          | 1.247                   | 1.247             | 1.247             | 1.665                | 1.665             | 1.665             |
| R2                          | 0.633                   | 0.637             | 0.681             | 0.607                | 0.614             | 0.638             |
| No. of obs.                 | 792582                  | 792582            | 792582            | 792582               | 792582            | 792582            |
| Scholar FE                  | Y                       | Y                 | Y                 | Y                    | Y                 | Y                 |
| Year FE                     | Y                       | Y                 | Y                 | Y                    | Y                 | Y                 |
| Baseline Covariates*Year FE |                         | Y                 |                   |                      | Y                 |                   |
| Entropy Balancing           |                         |                   | Y                 |                      |                   | Y                 |
| <b>Panel C</b>              | Total Publications      |                   |                   | Total Citations      |                   |                   |
| Ties to China $\times$ Post | -0.011<br>(0.004)       | -0.010<br>(0.004) | -0.013<br>(0.007) | -0.157<br>(0.008)    | -0.097<br>(0.009) | -0.097<br>(0.012) |
| Pre-treatment avg.          | 2.346                   | 2.346             | 2.346             | 5.070                | 5.070             | 5.070             |
| R2                          | 0.748                   | 0.748             | 0.787             | 0.677                | 0.678             | 0.718             |
| No. of obs.                 | 792582                  | 792582            | 792582            | 792582               | 792582            | 792582            |
| Scholar FE                  | Y                       | Y                 | Y                 | Y                    | Y                 | Y                 |
| Year FE                     | Y                       | Y                 | Y                 | Y                    | Y                 | Y                 |
| Baseline Covariates*Year FE |                         | Y                 |                   |                      | Y                 |                   |
| Entropy Balancing           |                         |                   | Y                 |                      |                   | Y                 |

*Note:* All outcomes are transformed with inverse hyperbolic sine. For Columns (1) to (6), the models always control for scholar and year fixed effects. In Columns (2) and (5), we include the interactions between year dummies and four baseline covariates: 1) total number of publications in 2010-2014, 2) total citations in 2010-2014, 3) number of NIH-funded publications in 2010-2014, and 4) indicator for Asian researcher. In Columns (3) and (6), we use entropy balancing to balance all four covariates before running the regression. Standard errors are clustered at the scholar level.



Table S4. Impacts on Productivity: Poisson Likelihood

|                             | (1)                     | (2)               | (3)               | (4)                  | (5)               | (6)               |
|-----------------------------|-------------------------|-------------------|-------------------|----------------------|-------------------|-------------------|
| <b>Panel A</b>              | PubMed Publications     |                   |                   | PubMed Citations     |                   |                   |
| Ties to China $\times$ Post | -0.035<br>(0.005)       | -0.038<br>(0.005) | -0.038<br>(0.019) | -0.113<br>(0.014)    | -0.095<br>(0.015) | -0.152<br>(0.078) |
| Pre-treatment avg.          | 5.929                   | 5.929             | 5.929             | 341.941              | 341.941           | 341.941           |
| R2                          | 0.549                   | 0.549             | 0.517             | 0.776                | 0.777             | 0.420             |
| No. of obs.                 | 792582                  | 792582            | 792582            | 792582               | 792582            | 792582            |
| Scholar FE                  | Y                       | Y                 | Y                 | Y                    | Y                 | Y                 |
| Year FE                     | Y                       | Y                 | Y                 | Y                    | Y                 | Y                 |
| Baseline Covariates*Year FE |                         | Y                 |                   |                      | Y                 |                   |
| Entropy Balancing           |                         |                   | Y                 |                      |                   | Y                 |
| <b>Panel B</b>              | Non-PubMed Publications |                   |                   | Non-PubMed Citations |                   |                   |
| Ties to China $\times$ Post | -0.005<br>(0.008)       | 0.001<br>(0.010)  | -0.032<br>(0.060) | 0.032<br>(0.019)     | -0.023<br>(0.022) | 0.110<br>(0.082)  |
| Pre-treatment avg.          | 3.454                   | 3.454             | 3.454             | 41.819               | 41.819            | 41.819            |
| R2                          | 0.523                   | 0.524             | 0.494             | 0.815                | 0.817             | 0.841             |
| No. of obs.                 | 792582                  | 792582            | 792582            | 792582               | 792582            | 792582            |
| Scholar FE                  | Y                       | Y                 | Y                 | Y                    | Y                 | Y                 |
| Year FE                     | Y                       | Y                 | Y                 | Y                    | Y                 | Y                 |
| Baseline Covariates*Year FE |                         | Y                 |                   |                      | Y                 |                   |
| Entropy Balancing           |                         |                   | Y                 |                      |                   | Y                 |
| <b>Panel C</b>              | Total Publications      |                   |                   | Total Citations      |                   |                   |
| Ties to China $\times$ Post | -0.020<br>(0.005)       | -0.020<br>(0.005) | -0.031<br>(0.025) | -0.091<br>(0.013)    | -0.082<br>(0.014) | -0.122<br>(0.073) |
| Pre-treatment avg.          | 9.383                   | 9.383             | 9.383             | 383.760              | 383.760           | 383.760           |
| R2                          | 0.605                   | 0.605             | 0.548             | 0.786                | 0.787             | 0.496             |
| No. of obs.                 | 792582                  | 792582            | 792582            | 792582               | 792582            | 792582            |
| Scholar FE                  | Y                       | Y                 | Y                 | Y                    | Y                 | Y                 |
| Year FE                     | Y                       | Y                 | Y                 | Y                    | Y                 | Y                 |
| Baseline Covariates*Year FE |                         | Y                 |                   |                      | Y                 |                   |
| Entropy Balancing           |                         |                   | Y                 |                      |                   | Y                 |

*Note:* All models are estimated using a Poisson likelihood. For Columns (1) to (6), the models always control for scholar and year fixed effects. In Columns (2) and (5), we include the interactions between year dummies and four baseline covariates: 1) total number of publications in 2010-2014, 2) total citations in 2010-2014, 3) number of NIH-funded publications in 2010-2014, and 4) indicator for Asian researcher. In Columns (3) and (6), we use entropy balancing to balance all four covariates before running the regression. Standard errors are clustered at the scholar level.

46 **E. Alternative Metrics of Productivity.** We consider four alternative metrics of productivity. The first and second refer to the  
47 average citations of all the papers or all the PubMed papers published by scholar  $i$  in year  $t$ . The third one captures the  
48 influence of a publication based on field citation ratio provided by Dimensions.<sup>†</sup> Based on this ratio, we further define a paper  
49 as a hit paper if its field citation ratio is above the 95% percentile of the variable in our sample (24). As shown in Table S5,  
50 all these outcomes are negatively affected by the treatment, implying that our main finding is robust to different metrics of  
51 productivity.

**Table S5. The Impacts on Productivity: Alternative Outcome Variables**

|                             | (1)                     | (2)               | (3)               | (4)                   | (5)               | (6)               |
|-----------------------------|-------------------------|-------------------|-------------------|-----------------------|-------------------|-------------------|
| <b>Panel A</b>              | Avg. Citations          |                   |                   | Avg. PubMed Citations |                   |                   |
| Ties to China $\times$ Post | -0.143<br>(0.005)       | -0.089<br>(0.005) | -0.088<br>(0.010) | -0.145<br>(0.005)     | -0.075<br>(0.006) | -0.075<br>(0.010) |
| Pre-treatment avg.          | 2.825                   | 2.825             | 2.825             | 2.584                 | 2.584             | 2.584             |
| R2                          | 0.548                   | 0.550             | 0.583             | 0.527                 | 0.530             | 0.568             |
| No. of obs.                 | 792582                  | 792582            | 792582            | 792582                | 792582            | 792582            |
| Scholar FE                  | Y                       | Y                 | Y                 | Y                     | Y                 | Y                 |
| Year FE                     | Y                       | Y                 | Y                 | Y                     | Y                 | Y                 |
| Baseline Covariates*Year FE |                         | Y                 |                   |                       | Y                 |                   |
| Entropy Balancing           |                         |                   | Y                 |                       |                   | Y                 |
| <b>Panel B</b>              | Avg. Relative Citations |                   |                   | No. of Hit Papers     |                   |                   |
| Ties to China $\times$ Post | -0.137<br>(0.003)       | -0.062<br>(0.004) | -0.059<br>(0.009) | -0.078<br>(0.002)     | -0.013<br>(0.002) | -0.016<br>(0.006) |
| Pre-treatment avg.          | 1.554                   | 1.554             | 1.554             | 0.278                 | 0.278             | 0.278             |
| R2                          | 0.503                   | 0.518             | 0.553             | 0.426                 | 0.472             | 0.493             |
| No. of obs.                 | 792582                  | 792582            | 792582            | 792582                | 792582            | 792582            |
| Scholar FE                  | Y                       | Y                 | Y                 | Y                     | Y                 | Y                 |
| Year FE                     | Y                       | Y                 | Y                 | Y                     | Y                 | Y                 |
| Baseline Covariates*Year FE |                         | Y                 |                   |                       | Y                 |                   |
| Entropy Balancing           |                         |                   | Y                 |                       |                   | Y                 |

*Note:* All outcomes are log-transformed. For Columns (1) to (6), the models always control for scholar and year fixed effects. In Columns (2) and (5), we include the interactions between year dummies and four baseline covariates: 1) total number of publications in 2010-2014, 2) total citations in 2010-2014, 3) number of NIH-funded publications in 2010-2014, and 4) indicator for Asian researcher. In Columns (3) and (6), we use entropy balancing to balance all four covariates before running the regression. Standard errors are clustered at the scholar level.

<sup>†</sup> For each paper, field citation ratio is calculated by "dividing the number of citations a paper has received by the average number received by documents published in the same year and in the same Fields of Research (FoR) category."

Table S6. Effects on Productivity by Journal Rankings

|                             | (1)                              | (2)               | (3)               | (4)                           | (5)               | (6)               |
|-----------------------------|----------------------------------|-------------------|-------------------|-------------------------------|-------------------|-------------------|
| <b>Panel A</b>              | Top-100 Journal Publications     |                   |                   | Top-100 Journal Citations     |                   |                   |
| Ties to China $\times$ Post | -0.022<br>(0.002)                | -0.007<br>(0.002) | -0.008<br>(0.005) | -0.189<br>(0.007)             | -0.080<br>(0.007) | -0.079<br>(0.029) |
| Pre-treatment avg.          | 0.233                            | 0.233             | 0.233             | 0.956                         | 0.956             | 0.956             |
| R2                          | 0.613                            | 0.615             | 0.670             | 0.438                         | 0.444             | 0.483             |
| No. of obs.                 | 792582                           | 792582            | 792582            | 792582                        | 792582            | 792582            |
| Scholar FE                  | Y                                | Y                 | Y                 | Y                             | Y                 | Y                 |
| Year FE                     | Y                                | Y                 | Y                 | Y                             | Y                 | Y                 |
| Baseline Covariates*Year FE |                                  | Y                 |                   |                               | Y                 |                   |
| Entropy Balancing           |                                  |                   | Y                 |                               |                   | Y                 |
| <b>Panel B</b>              | Non-Top-100 Journal Publications |                   |                   | Non-Top-100 Journal Citations |                   |                   |
| Ties to China $\times$ Post | -0.006<br>(0.003)                | -0.007<br>(0.004) | -0.010<br>(0.007) | -0.165<br>(0.007)             | -0.095<br>(0.008) | -0.098<br>(0.013) |
| Pre-treatment avg.          | 1.837                            | 1.837             | 1.837             | 4.326                         | 4.326             | 4.326             |
| R2                          | 0.750                            | 0.750             | 0.791             | 0.676                         | 0.677             | 0.717             |
| No. of obs.                 | 792582                           | 792582            | 792582            | 792582                        | 792582            | 792582            |
| Scholar FE                  | Y                                | Y                 | Y                 | Y                             | Y                 | Y                 |
| Year FE                     | Y                                | Y                 | Y                 | Y                             | Y                 | Y                 |
| Baseline Covariates*Year FE |                                  | Y                 |                   |                               | Y                 |                   |
| Entropy Balancing           |                                  |                   | Y                 |                               |                   | Y                 |

*Note:* All outcomes are log-transformed. For Columns (1) to (6), the models always control for scholar and year fixed effects. In Columns (2) and (5), we include the interactions between year dummies and four baseline covariates: 1) total number of publications in 2010-2014, 2) total citations in 2010-2014, 3) number of NIH-funded publications in 2010-2014, and 4) indicator for Asian researcher. In Columns (3) and (6), we use entropy balancing to balance all four covariates before running the regression. Standard errors are clustered at the scholar level.

53 **G. COVID Publications.** Given the significance of the COVID pandemic, it is important to understand how that may impact the  
54 research of the scientists in our sample. Table S7 breaks down the percentage of COVID publications, out of all publications,  
55 for the treatment and control groups in 2020 and 2021. “COVID publications” are defined as those for which the titles contain  
56 either “COVID” or “coronavirus”. As Table S7 shows, COVID publications account for a small percentage of the total number  
57 of publications of both the treatment and control groups.

**Table S7. Percentage of COVID Publications by Group**

|      | Treated | Control |
|------|---------|---------|
| 2020 | 3.6%    | 4.3%    |
| 2021 | 3.9%    | 5.2%    |

58 Because there was essentially no COVID publication prior to 2020, we cannot use COVID publications as an outcome.  
59 To check the influence of COVID publications on the main results, we remove all COVID publications from the publication  
60 (and associated citation) records of the scientists in our sample and report the main results in Table S8. Removing COVID  
61 publications has little impact on the main results and does not change our substantive conclusions.

**Table S8. The Impacts on Productivity: Excluding COVID Papers**

|                             | (1)                     | (2)               | (3)               | (4)                  | (5)               | (6)               |
|-----------------------------|-------------------------|-------------------|-------------------|----------------------|-------------------|-------------------|
| <b>Panel A</b>              | PubMed Publications     |                   |                   | PubMed Citations     |                   |                   |
| Ties to China × Post        | -0.026<br>(0.003)       | -0.015<br>(0.003) | -0.015<br>(0.005) | -0.186<br>(0.007)    | -0.083<br>(0.008) | -0.082<br>(0.012) |
| Pre-treatment avg.          | 1.502                   | 1.502             | 1.502             | 4.163                | 4.163             | 4.163             |
| R2                          | 0.732                   | 0.732             | 0.783             | 0.663                | 0.665             | 0.709             |
| No. of obs.                 | 792582                  | 792582            | 792582            | 792582               | 792582            | 792582            |
| Scholar FE                  | Y                       | Y                 | Y                 | Y                    | Y                 | Y                 |
| Year FE                     | Y                       | Y                 | Y                 | Y                    | Y                 | Y                 |
| Baseline Covariates*Year FE |                         | Y                 |                   |                      | Y                 |                   |
| Entropy Balancing           |                         |                   | Y                 |                      |                   | Y                 |
| <b>Panel B</b>              | Non-PubMed Publications |                   |                   | Non-PubMed Citations |                   |                   |
| Ties to China × Post        | 0.025<br>(0.003)        | 0.017<br>(0.004)  | 0.016<br>(0.008)  | -0.082<br>(0.005)    | -0.068<br>(0.006) | -0.055<br>(0.013) |
| Pre-treatment avg.          | 0.981                   | 0.981             | 0.981             | 1.401                | 1.401             | 1.401             |
| R2                          | 0.641                   | 0.646             | 0.690             | 0.623                | 0.631             | 0.654             |
| No. of obs.                 | 792582                  | 792582            | 792582            | 792582               | 792582            | 792582            |
| Scholar FE                  | Y                       | Y                 | Y                 | Y                    | Y                 | Y                 |
| Year FE                     | Y                       | Y                 | Y                 | Y                    | Y                 | Y                 |
| Baseline Covariates*Year FE |                         | Y                 |                   |                      | Y                 |                   |
| Entropy Balancing           |                         |                   | Y                 |                      |                   | Y                 |
| <b>Panel C</b>              | Total Publications      |                   |                   | Total Citations      |                   |                   |
| Ties to China × Post        | -0.008<br>(0.003)       | -0.004<br>(0.004) | -0.006<br>(0.006) | -0.172<br>(0.007)    | -0.088<br>(0.008) | -0.084<br>(0.012) |
| Pre-treatment avg.          | 1.878                   | 1.878             | 1.878             | 4.470                | 4.470             | 4.470             |
| R2                          | 0.758                   | 0.759             | 0.799             | 0.689                | 0.691             | 0.731             |
| No. of obs.                 | 792582                  | 792582            | 792582            | 792582               | 792582            | 792582            |
| Scholar FE                  | Y                       | Y                 | Y                 | Y                    | Y                 | Y                 |
| Year FE                     | Y                       | Y                 | Y                 | Y                    | Y                 | Y                 |
| Baseline Covariates*Year FE |                         | Y                 |                   |                      | Y                 |                   |
| Entropy Balancing           |                         |                   | Y                 |                      |                   | Y                 |

*Note:* All outcomes are log-transformed. For Columns (1) to (6), the models always control for scholar and year fixed effects. In Columns (2) and (5), we include the interactions between year dummies and four baseline covariates: 1) total number of publications in 2010-2014, 2) total citations in 2010-2014, 3) number of NIH-funded publications in 2010-2014, and 4) indicator for Asian researcher. In Columns (3) and (6), we use entropy balancing to balance all four covariates before running the regression. Standard errors are clustered at the scholar level.

Table S9. The Impacts on Productivity: Treatment Intensity

|                                        | (1)                     | (2)               | (3)                  | (4)               |
|----------------------------------------|-------------------------|-------------------|----------------------|-------------------|
| <b>Panel A</b>                         | PubMed Publications     |                   | PubMed Citations     |                   |
| Log No. of China Collab. $\times$ Post | -0.018<br>(0.002)       | -0.013<br>(0.002) | -0.122<br>(0.005)    | -0.044<br>(0.006) |
| R2                                     | 0.732                   | 0.732             | 0.660                | 0.662             |
| No. of obs.                            | 792582                  | 792582            | 792582               | 792582            |
| Scholar FE                             | Y                       | Y                 | Y                    | Y                 |
| Year FE                                | Y                       | Y                 | Y                    | Y                 |
| Baseline Covariates*Year FE            |                         | Y                 |                      | Y                 |
| <b>Panel B</b>                         | Non-PubMed Publications |                   | Non-PubMed Citations |                   |
| Log No. of China Collab. $\times$ Post | 0.014<br>(0.002)        | 0.012<br>(0.003)  | -0.068<br>(0.004)    | -0.055<br>(0.005) |
| R2                                     | 0.641                   | 0.645             | 0.620                | 0.627             |
| No. of obs.                            | 792582                  | 792582            | 792582               | 792582            |
| Scholar FE                             | Y                       | Y                 | Y                    | Y                 |
| Year FE                                | Y                       | Y                 | Y                    | Y                 |
| Baseline Covariates*Year FE            |                         | Y                 |                      | Y                 |
| <b>Panel C</b>                         | Total Publications      |                   | Total Citations      |                   |
| Log No. of China Collab. $\times$ Post | -0.009<br>(0.002)       | -0.005<br>(0.003) | -0.113<br>(0.004)    | -0.051<br>(0.005) |
| R2                                     | 0.757                   | 0.758             | 0.685                | 0.687             |
| No. of obs.                            | 792582                  | 792582            | 792582               | 792582            |
| Scholar FE                             | Y                       | Y                 | Y                    | Y                 |
| Year FE                                | Y                       | Y                 | Y                    | Y                 |
| Baseline Covariates*Year FE            |                         | Y                 |                      | Y                 |

*Note:* All outcomes are log-transformed. Treatment is the logged numbers of publications that are collaborations with Chinese scientists during 2010-2014. For Columns (1) to (4), the models always control for scholar and year fixed effects. In Columns (2) and (4), we include the interactions between year dummies and four baseline covariates: 1) total number of publications in 2010-2014, 2) total citations in 2010-2014, 3) number of NIH-funded publications in 2010-2014, and 4) indicator for Asian researcher. Standard errors are clustered at the scholar level.

## 63 I. Citation Effects by Funding Sources.

Table S10. Effects on Citations by Funding Sources

|                             | Citation Effects by Nature of Publication |                   |                   |                   |                      |
|-----------------------------|-------------------------------------------|-------------------|-------------------|-------------------|----------------------|
|                             | All                                       | NIH-Funded        | Non<br>NIH-Funded | China-<br>Funded  | Non China-<br>Funded |
| Ties to China $\times$ Post | -0.105<br>(0.008)                         | -0.093<br>(0.008) | -0.064<br>(0.008) | -0.174<br>(0.005) | -0.089<br>(0.008)    |
| Pre-treatment avg.          | 4.470                                     | 2.678             | 3.252             | 0.781             | 4.339                |
| R2                          | 0.687                                     | 0.662             | 0.642             | 0.570             | 0.680                |
| No. of obs.                 | 792582                                    | 792582            | 792582            | 792582            | 792582               |
| Scholar FE                  | Y                                         | Y                 | Y                 | Y                 | Y                    |
| Year FE                     | Y                                         | Y                 | Y                 | Y                 | Y                    |
| Baseline Covariates*Year    | Y                                         | Y                 | Y                 | Y                 | Y                    |

*Note:* In all columns, outcomes are log-transformed and we control for scholar and year fixed effects, as well as the interactions of year dummies with the baseline covariates: 1) total number of publications in 2010-2014, 2) total citations in 2010-2014, 3) number of NIH-funded publications in 2010-2014, and 4) indicator for being Asian researcher. Standard errors are clustered at the scholar level.

## 64 J. Effects by Collaboration Types.

Table S11. The Impacts on Productivity: Collaboration Types

|                             | Effects by Nature of Publication |                                           |                                       |                   |                                   |                               |
|-----------------------------|----------------------------------|-------------------------------------------|---------------------------------------|-------------------|-----------------------------------|-------------------------------|
|                             | U.S. Pub-<br>lications           | Intl (Non-<br>China)<br>Publica-<br>tions | China-<br>Collab<br>Publica-<br>tions | U.S.<br>Citations | Intl (Non-<br>China)<br>Citations | China-<br>Collab<br>Citations |
| Ties to China $\times$ Post | 0.011<br>(0.004)                 | -0.013<br>(0.003)                         | -0.058<br>(0.002)                     | -0.030<br>(0.008) | -0.116<br>(0.009)                 | -0.456<br>(0.007)             |
| Pre-treatment avg.          | 1.491                            | 0.795                                     | 0.401                                 | 3.563             | 2.469                             | 1.404                         |
| R2                          | 0.716                            | 0.636                                     | 0.681                                 | 0.627             | 0.530                             | 0.565                         |
| No. of obs.                 | 792582                           | 792582                                    | 792582                                | 792582            | 792582                            | 792582                        |
| Scholar FE                  | Y                                | Y                                         | Y                                     | Y                 | Y                                 | Y                             |
| Year FE                     | Y                                | Y                                         | Y                                     | Y                 | Y                                 | Y                             |
| Baseline Covariates*Year FE | Y                                | Y                                         | Y                                     | Y                 | Y                                 | Y                             |

*Note:* In all columns, outcomes are log-transformed and we control for scholar and year fixed effects, as well as the interactions of year dummies with the baseline covariates: 1) total number of publications in 2010-2014, 2) total citations in 2010-2014, 3) number of NIH-funded publications in 2010-2014, and 4) indicator for being Asian researcher. Standard errors are clustered at the scholar level.

65 **K. Considering Migration.** In this section, we explore the potential effects of migration on our analysis of scientific productivity.  
 66 Our baseline analysis does not consider migration and counts the publications of scientists regardless of their migration decisions.  
 67 Now, we delve into how migration might influence our findings.

68 While we cannot observe migration directly, we consider a proxy for migration based on the country of affiliations in the  
 69 publications. To ensure the reliability of our findings, we employ different migration thresholds, assuming that a scientist has  
 70 “migrated” to another country if more than 50% or 75% of their publications are affiliated with non-U.S. countries only. Using  
 71 these criteria, we document the proportions of migration for both our treated and control groups of scientists in Table S12  
 72 before and after the onset of the investigations.

73 Under the 50% threshold, the probabilities of migration for treated and control principal investigators (PIs) were 0.97% and  
 74 0.95%, respectively, before 2018. However, after 2018, these probabilities increased to 1.88% for treated PIs and 1.32% for  
 75 the control group. This suggests that treated PIs might be relatively more likely to move from the United States after 2018  
 76 compared to the control group.

77 While this finding on migration outcomes aligns with (3) and has important policy implications, we can confirm that our  
 78 conclusions regarding publications and citations remain unaffected by migration. Since the share of migrated scientists is small,  
 79 the impact of migrated scientists is minimal for our finding on productivity. Table S13 shows the main results hold if we  
 80 exclude those with more than 50% of publications affiliated with non-U.S. countries only.

**Table S12. Migration Statistics**

| Non-US publications | Before Treatment |             | After Treatment |             |
|---------------------|------------------|-------------|-----------------|-------------|
|                     | 50%              | 75%         | 50%             | 75%         |
| Treated             | 340 (0.97%)      | 106 (0.30%) | 660 (1.88%)     | 372 (1.06%) |
| Control             | 738 (0.95%)      | 224 (0.29%) | 1032 (1.32%)    | 700 (0.90%) |

*Note:* Numbers in brackets show the proportions of migrated scientists with respect to the total number of scientists of each group.

**Table S13. The Impacts on Productivity: Excluding Migrated Scientists**

|                             | (1)                     | (2)               | (3)               | (4)                  | (5)               | (6)               |
|-----------------------------|-------------------------|-------------------|-------------------|----------------------|-------------------|-------------------|
| <b>Panel A</b>              | PubMed Publications     |                   |                   | PubMed Citations     |                   |                   |
| Ties to China × Post        | -0.028<br>(0.003)       | -0.021<br>(0.003) | -0.022<br>(0.005) | -0.194<br>(0.007)    | -0.101<br>(0.008) | -0.104<br>(0.012) |
| Pre-treatment avg.          | 1.501                   | 1.501             | 1.501             | 4.164                | 4.164             | 4.164             |
| R2                          | 0.731                   | 0.731             | 0.782             | 0.660                | 0.661             | 0.706             |
| No. of obs.                 | 776062                  | 776062            | 776062            | 776062               | 776062            | 776062            |
| Scholar FE                  | Y                       | Y                 | Y                 | Y                    | Y                 | Y                 |
| Year FE                     | Y                       | Y                 | Y                 | Y                    | Y                 | Y                 |
| Baseline Covariates*Year FE |                         | Y                 |                   |                      | Y                 |                   |
| Entropy Balancing           |                         |                   | Y                 |                      |                   | Y                 |
| <b>Panel B</b>              | Non-PubMed Publications |                   |                   | Non-PubMed Citations |                   |                   |
| Ties to China × Post        | 0.023<br>(0.003)        | 0.014<br>(0.004)  | 0.010<br>(0.008)  | -0.081<br>(0.006)    | -0.073<br>(0.006) | -0.062<br>(0.014) |
| Pre-treatment avg.          | 0.982                   | 0.982             | 0.982             | 1.397                | 1.397             | 1.397             |
| R2                          | 0.640                   | 0.645             | 0.690             | 0.619                | 0.627             | 0.649             |
| No. of obs.                 | 776062                  | 776062            | 776062            | 776062               | 776062            | 776062            |
| Scholar FE                  | Y                       | Y                 | Y                 | Y                    | Y                 | Y                 |
| Year FE                     | Y                       | Y                 | Y                 | Y                    | Y                 | Y                 |
| Baseline Covariates*Year FE |                         | Y                 |                   |                      | Y                 |                   |
| Entropy Balancing           |                         |                   | Y                 |                      |                   | Y                 |
| <b>Panel C</b>              | Total Publications      |                   |                   | Total Citations      |                   |                   |
| Ties to China × Post        | -0.012<br>(0.003)       | -0.010<br>(0.004) | -0.014<br>(0.007) | -0.181<br>(0.007)    | -0.107<br>(0.008) | -0.109<br>(0.012) |
| Pre-treatment avg.          | 1.879                   | 1.879             | 1.879             | 4.471                | 4.471             | 4.471             |
| R2                          | 0.757                   | 0.757             | 0.797             | 0.685                | 0.687             | 0.727             |
| No. of obs.                 | 776062                  | 776062            | 776062            | 776062               | 776062            | 776062            |
| Scholar FE                  | Y                       | Y                 | Y                 | Y                    | Y                 | Y                 |
| Year FE                     | Y                       | Y                 | Y                 | Y                    | Y                 | Y                 |
| Baseline Covariates*Year FE |                         | Y                 |                   |                      | Y                 |                   |
| Entropy Balancing           |                         |                   | Y                 |                      |                   | Y                 |

*Note:* All outcomes are log-transformed. For Columns (1) to (6), the models always control for scholar and year fixed effects. In Columns (2) and (5), we include the interactions between year dummies and four baseline covariates: 1) total number of publications in 2010-2014, 2) total citations in 2010-2014, 3) number of NIH-funded publications in 2010-2014, and 4) indicator for Asian researcher. In Columns (3) and (6), we use entropy balancing to balance all four covariates before running the regression. Standard errors are clustered at the scholar level.



81 **3. More Heterogeneous Impacts**

82 **A. Effects by Pre-treatment Productivity.** To investigate whether the treatment generates different impacts on scholars with  
83 varying levels of productivity, we divide the whole sample into two parts, based on whether a scholar’s pre-treatment (2010–2014)  
84 total citation is above or below the median level (672 citations). In Table S14, odd columns report estimates using the group of  
85 highly productive scholars while even columns report estimates using the less productive group. The regression coefficients are  
86 smaller for the more productive group. However, scholars from this group have larger pre-treatment averages across all the  
87 outcomes. As explained in the main text, our outcomes are transformed by taking logarithm, and the regression estimates  
88 could be interpreted as percentages. Therefore, we can infer the impacts on the untransformed outcomes by multiplying  
89 the pre-treatment averages on the original scale with the effect estimates. Consider the total citations as an example. The  
90 pre-treatment averages are 5.152 and 2.784 for the two groups, respectively, which correspond to 171.777 and 15.184 citations  
91 on the original scale. Our estimates thus imply that the decline in citation would be  $171.777 \times -0.034 = -5.840$  and  
92  $15.184 \times -0.104 = -1.579$  for the two groups. The highly productive group is more severely affected by the treatment in terms  
93 of the level of the outcome. This is true for the other outcomes as well.

**Table S14. The Impacts on Productivity: Heterogeneity across Pre-treatment Productivity Levels**

|                             | (1)                     | (2)               | (3)                  | (4)               |
|-----------------------------|-------------------------|-------------------|----------------------|-------------------|
| <b>Panel A</b>              | PubMed Publications     |                   | PubMed Citations     |                   |
| Ties to China $\times$ Post | -0.013<br>(0.008)       | -0.025<br>(0.006) | -0.026<br>(0.019)    | -0.086<br>(0.013) |
| Pre-treatment avg.          | 1.770                   | 0.839             | 4.839                | 2.491             |
| R2                          | 0.769                   | 0.576             | 0.676                | 0.511             |
| No. of obs.                 | 396543                  | 396039            | 396543               | 396039            |
| Scholar FE                  | Y                       | Y                 | Y                    | Y                 |
| Year FE                     | Y                       | Y                 | Y                    | Y                 |
| Entropy Balancing           | Y                       | Y                 | Y                    | Y                 |
| Pre-treatment productivity  | High                    | Low               | High                 | Low               |
| <b>Panel B</b>              | Non-PubMed Publications |                   | Non-PubMed Citations |                   |
| Ties to China $\times$ Post | 0.014<br>(0.012)        | -0.005<br>(0.010) | -0.038<br>(0.022)    | -0.055<br>(0.010) |
| Pre-treatment avg.          | 1.176                   | 0.497             | 1.679                | 0.714             |
| R2                          | 0.682                   | 0.511             | 0.659                | 0.486             |
| No. of obs.                 | 396543                  | 396039            | 396543               | 396039            |
| Scholar FE                  | Y                       | Y                 | Y                    | Y                 |
| Year FE                     | Y                       | Y                 | Y                    | Y                 |
| Entropy Balancing           | Y                       | Y                 | Y                    | Y                 |
| Pre-treatment productivity  | High                    | Low               | High                 | Low               |
| <b>Panel C</b>              | Total Publications      |                   | Total Citations      |                   |
| Ties to China $\times$ Post | -0.006<br>(0.009)       | -0.023<br>(0.010) | -0.034<br>(0.018)    | -0.104<br>(0.013) |
| Pre-treatment avg.          | 2.186                   | 1.118             | 5.152                | 2.784             |
| R2                          | 0.780                   | 0.621             | 0.695                | 0.540             |
| No. of obs.                 | 396543                  | 396039            | 396543               | 396039            |
| Scholar FE                  | Y                       | Y                 | Y                    | Y                 |
| Year FE                     | Y                       | Y                 | Y                    | Y                 |
| Entropy Balancing           | Y                       | Y                 | Y                    | Y                 |
| Pre-treatment productivity  | High                    | Low               | High                 | Low               |

*Note:* All outcomes are log-transformed. The models always control for scholar and year fixed effects, with all four covariates balanced by entropy balancing. Columns (1) and (3) present results for scholars whose pre-treatment productivity is above the median level, while Columns (2) and (4) present results for those whose pre-treatment productivity is below the median level. Standard errors are clustered at the scholar level.

94 **B. Effects by Career Stage.** We divide our sample into two parts to proxy career stages, based on whether a scholar's first  
95 publication was before or after 1996 (the median year for the first publication in our sample). In Table S15, odd and even  
96 columns report estimates using scholars below and above median. The estimates are similar in magnitude across the two  
97 groups.

**Table S15. The Impacts on Productivity: Heterogeneity across Career Stages**

|                      | (1)                     | (2)               | (3)                  | (4)               |
|----------------------|-------------------------|-------------------|----------------------|-------------------|
| <b>Panel A</b>       | PubMed Publications     |                   | PubMed Citations     |                   |
| Ties to China × Post | -0.014<br>(0.006)       | -0.014<br>(0.008) | -0.092<br>(0.013)    | -0.081<br>(0.020) |
| Pre-treatment avg.   | 1.386                   | 1.589             | 3.927                | 4.339             |
| R2                   | 0.800                   | 0.823             | 0.735                | 0.756             |
| No. of obs.          | 395577                  | 397005            | 395577               | 397005            |
| Scholar FE           | Y                       | Y                 | Y                    | Y                 |
| Year FE              | Y                       | Y                 | Y                    | Y                 |
| Entropy Balancing    | Y                       | Y                 | Y                    | Y                 |
| Career Stage         | Early                   | Late              | Early                | Late              |
| <b>Panel B</b>       | Non-PubMed Publications |                   | Non-PubMed Citations |                   |
| Ties to China × Post | 0.032<br>(0.006)        | 0.006<br>(0.015)  | -0.042<br>(0.012)    | -0.057<br>(0.024) |
| Pre-treatment avg.   | 0.883                   | 1.054             | 1.304                | 1.474             |
| R2                   | 0.732                   | 0.734             | 0.690                | 0.707             |
| No. of obs.          | 395577                  | 397005            | 395577               | 397005            |
| Scholar FE           | Y                       | Y                 | Y                    | Y                 |
| Year FE              | Y                       | Y                 | Y                    | Y                 |
| Entropy Balancing    | Y                       | Y                 | Y                    | Y                 |
| Career Stage         | Early                   | Late              | Early                | Late              |
| <b>Panel C</b>       | Total Publications      |                   | Total Citations      |                   |
| Ties to China × Post | 0.004<br>(0.006)        | -0.011<br>(0.011) | -0.095<br>(0.013)    | -0.086<br>(0.019) |
| Pre-treatment avg.   | 1.735                   | 1.985             | 4.219                | 4.658             |
| R2                   | 0.821                   | 0.829             | 0.755                | 0.772             |
| No. of obs.          | 395577                  | 397005            | 395577               | 397005            |
| Scholar FE           | Y                       | Y                 | Y                    | Y                 |
| Year FE              | Y                       | Y                 | Y                    | Y                 |
| Entropy Balancing    | Y                       | Y                 | Y                    | Y                 |
| Career Stage         | Early                   | Late              | Early                | Late              |

*Note:* All outcomes are log-transformed. The models always control for scholar and year fixed effects, with all four covariates balanced by entropy balancing. Columns (1) and (3) present results for scholars who are at the early stage of their career, while Columns (2) and (4) present results for those who are at the late stage of their career. Standard errors are clustered at the scholar level.

98 **4. More Results by Fields**99 **A. Fields by Percentage of U.S.-CN Collaboration and NIH Funding.****Table S16. % U.S.-CN Collaboration and NIH Funding by Field**

| Top Fields by % U.S.-CN Collaboration  |            | Top Fields by % NIH Funding            |            |
|----------------------------------------|------------|----------------------------------------|------------|
| Field Name                             | Percentage | Field Name                             | Percentage |
| Materials Eng.                         | 18.2%      | Biochemistry & Cell Biology            | 52.6%      |
| Macromolecular & Materials Chemistry   | 14.5%      | Medical Microbiology                   | 48.7%      |
| Nanotechnology                         | 13.0%      | Medical Physiology                     | 46.9%      |
| Physical Chemistry                     | 13.0%      | Bioinformatics & Computational Biology | 44.7%      |
| Earth Sci.                             | 12.4%      | Biological Psychology                  | 43.3%      |
| Engineering                            | 11.9%      | Neurosciences                          | 43.1%      |
| Condensed Matter Physics               | 11.2%      | Medicinal & Biomolecular Chemistry     | 40.3%      |
| Chemical Sci.                          | 9.8%       | Immunology                             | 38.5%      |
| Environmental Sci.                     | 9.5%       | Genetics                               | 37.9%      |
| Information & Computing Sci.           | 9.2%       | Biological Sci.                        | 37.0%      |
| Inorganic Chemistry                    | 8.9%       | Microbiology                           | 36.7%      |
| Bioinformatics & Computational Biology | 8.2%       | Medical Biotechnology                  | 36.6%      |
| Medicinal & Biomolecular Chemistry     | 8.1%       | Biomedical Eng.                        | 36.5%      |
| Medical Biotechnology                  | 7.9%       | Psychology                             | 33.4%      |
| Mathematical Sci.                      | 7.6%       | Epidemiology                           | 33.3%      |
| Genetics                               | 7.5%       | Pharmacology & Pharmaceutical Sci.     | 32.8%      |
| Agricultural, Veterinary & Food Sci.   | 7.2%       | Ophthalmology & Optometry              | 30.3%      |
| Physical Sci.                          | 6.9%       | Public Health                          | 30.2%      |
| Organic Chemistry                      | 6.7%       | Clinical & Health Psychology           | 28.1%      |
| Microbiology                           | 6.6%       | Paediatrics                            | 26.9%      |
| Biomedical Eng.                        | 6.6%       | Nutrition & Dietetics                  | 26.1%      |
| Biological Sci.                        | 6.5%       | Applied & Developmental Psychology     | 26.1%      |
| Biochemistry & Cell Biology            | 6.4%       | Organic Chemistry                      | 24.9%      |
| Ecology                                | 5.4%       | Social & Personality Psychology        | 24.2%      |
| Medical Physiology                     | 4.8%       | Biomedical & Clinical Sci.             | 23.9%      |
| Immunology                             | 4.5%       | Health Sci.                            | 23.3%      |
| Oncology & Carcinogenesis              | 4.4%       | Health Services & Systems              | 21.0%      |
| Epidemiology                           | 4.3%       | Reproductive Medicine                  | 20.5%      |
| Medical Microbiology                   | 4.0%       | Allied Health & Rehabilitation Science | 18.6%      |
| Neurosciences                          | 3.8%       | Cardiovascular Medicine & Haematology  | 18.1%      |
| Ophthalmology & Optometry              | 3.8%       | Clinical Sci.                          | 17.9%      |
| Pharmacology & Pharmaceutical Sci.     | 3.6%       | Chemical Sci.                          | 17.7%      |
| Biological Psychology                  | 3.4%       | Sports Science & Exercise              | 15.8%      |
| Dentistry                              | 3.1%       | Mathematical Sci.                      | 15.5%      |
| Biomedical & Clinical Sci.             | 3.1%       | Human Society                          | 15.3%      |
| Nutrition & Dietetics                  | 2.7%       | Dentistry                              | 14.8%      |
| Psychology                             | 2.5%       | Inorganic Chemistry                    | 14.7%      |
| Public Health                          | 2.5%       | Nursing                                | 13.6%      |
| Clinical Sci.                          | 2.2%       | Information & Computing Sci.           | 13.3%      |
| Reproductive Medicine                  | 2.1%       | Oncology & Carcinogenesis              | 12.8%      |
| Cardiovascular Medicine & Haematology  | 2.0%       | Engineering                            | 12.2%      |
| Health Sci.                            | 2.0%       | Physical Chemistry                     | 8.1%       |
| Social & Personality Psychology        | 1.9%       | Macromolecular & Materials Chemistry   | 8.1%       |
| Human Society                          | 1.9%       | Environmental Sci.                     | 8.1%       |
| Applied & Developmental Psychology     | 1.6%       | Nanotechnology                         | 7.5%       |
| Allied Health & Rehabilitation Science | 1.4%       | Agricultural, Veterinary & Food Sci.   | 6.4%       |
| Health Services & Systems              | 1.4%       | Ecology                                | 6.2%       |
| Clinical & Health Psychology           | 1.4%       | Physical Sci.                          | 4.8%       |
| Sports Science & Exercise              | 1.3%       | Materials Eng.                         | 3.2%       |
| Paediatrics                            | 1.2%       | Earth Sci.                             | 2.2%       |
| Nursing                                | 1.0%       | Condensed Matter Physics               | 1.6%       |

100 **References**

- 101 1. J Mervis, Pall of suspicion. *Science* (2023).  
102 2. K Imai, K Khanna, Improving ecological inference by predicting individual ethnicity from voter registration records. *Polit.*  
103 *Analysis* **24**, 263–272 (2016).  
104 3. Y Xie, X Lin, J Li, Q He, J Huang, Caught in the crossfire: Fears of Chinese–American scientists. *Proc. Natl. Acad. Sci.*  
105 **120**, e2216248120 (2023).
